# Supplementary material for: Evaluating the effect of alternative carbon allocation schemes in a land surface model (CLM4.5) on carbon fluxes, pools, and turnover in temperate forests
Source: Copernicus journal article supplement (doi:10.5194/gmd-10-3499-2017), 2017-09-22
Supplement: Supplementary file 1 [file gmd-10-3499-2017-supplement.pdf]

Supplement of Geosci. Model Dev., 10, 3499–3517, 2017  
<https://doi.org/10.5194/gmd-10-3499-2017-supplement>  
© Author(s) 2017. This work is distributed under  
the Creative Commons Attribution 3.0 License.

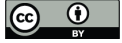

*Supplement of*

## **Evaluating the effect of alternative carbon allocation schemes in a land surface model (CLM4.5) on carbon fluxes, pools, and turnover in temperate forests**

**Francesc Montané et al.**

*Correspondence to:* Francesc Montané ([francesc.montane@gmail.com](mailto:francesc.montane@gmail.com))

The copyright of individual parts of the supplement might differ from the CC BY 3.0 License.

SUPPLEMENTARY METHODS AND FIGURES

**C allocation scheme effect on initial aboveground biomass and  $C_{stem}/C_{leaf}$  ratio**

To evaluate the effect of different C allocation approaches in initial aboveground biomass in equilibrium and we also compared them with tree-ring estimates of aboveground biomass data for 1980. The C allocation scheme used has a strong influence on initial aboveground biomass and the  $C_{stem}/C_{leaf}$  ratio, which can be explained with Eq. (4). When the model is in equilibrium conditions,  $dB_i/dt=0$  in Eq. (4), and denoting  $B_{stem}$  with  $C_{stem}$ , and  $B_{leaf}$  with  $C_{leaf}$ :

$$a_{stem} NPP = NPP_{stem} = u_{stem} C_{stem} \quad (5)$$

$$a_{leaf} NPP = NPP_{leaf} = u_{leaf} C_{leaf} \quad (6)$$

After dividing Eq. (5) by Eq. (6):

$$a_{stem}/a_{leaf} = NPP_{stem}/NPP_{leaf} = (C_{stem}/C_{leaf}) \times (u_{stem}/u_{leaf}) \quad (7)$$

$$C_{stem}/C_{leaf} = \frac{(NPP_{stem}/NPP_{leaf})}{(u_{stem}/u_{leaf})} \quad \text{or} \quad C_{stem}/C_{leaf} = \frac{(a_{stem}/a_{leaf})}{(u_{stem}/u_{leaf})} \quad (8)$$

In D-CLM4.5  $NPP_{stem}/NPP_{leaf} \approx 2$  and  $a_{stem}/a_{leaf} \approx 2$  for evergreen sites in favorable conditions (e.g. mean annual NPP  $\approx 1000 \text{ gCm}^{-2}\text{year}^{-1}$ ) and for deciduous sites;  $u_{stem}/u_{leaf}=0.02$  for deciduous and  $u_{stem}/u_{leaf}=0.06$  for evergreen forests. Therefore, in D-CLM4.5  $C_{stem}/C_{leaf} \approx 33$  for evergreen sites in favorable conditions; and  $C_{stem}/C_{leaf} \approx 100$  for deciduous sites.

Because the alternative C allocation approaches have different  $NPP_{stem}/NPP_{leaf}$  ratio than the one in D-CLM4.5, they showed different  $C_{stem}/C_{leaf}$  ratio, despite having the same  $u_{stem}/u_{leaf}$ . We compared the  $C_{stem}/C_{leaf}$  ratio from the different C allocation schemes and parameterizations with available observations for the sites (Table 1). In reference to the initial aboveground biomass (leaf+stem), we can use Eq. (4), and assuming equilibrium conditions,  $dB_i/dt=0$ , then:

$$a_{leaf} NPP + a_{stem} NPP = u_{leaf} C_{leaf} + u_{stem} C_{stem} \quad (9)$$

$$ANPP = u_{leaf} C_{leaf} + u_{stem} C_{stem} = C_{stem} (u_{stem} + u_{leaf} C_{leaf}/C_{stem}) \quad (10)$$

$$C_{stem}^* = ANPP / (u_{stem} + u_{leaf} C_{leaf}/C_{stem}) = ANPP / u_{stem} (1 + (NPP_{leaf}/NPP_{stem})) \quad (11)$$

Similarly to Eq (10),

$$ANPP = u_{leaf} C_{leaf} + u_{stem} C_{stem} = C_{leaf} (u_{leaf} + u_{stem} C_{stem} / C_{leaf})$$

(12)

$$C_{leaf}^* = ANPP / (u_{leaf} + u_{stem} C_{stem} / C_{leaf}) = ANPP / u_{leaf} (1 + (NPP_{stem} / NPP_{leaf}))$$

(13)

Hence,

$$C_{aboveground}^* = C_{leaf}^* + C_{stem}^* = ANPP / u_{leaf} (1 + (NPP_{stem} / NPP_{leaf})) + ANPP / u_{stem} (1 + (NPP_{leaf} / NPP_{stem}))$$

(14)

where  $C_{stem}^*$ ,  $C_{leaf}^*$ , and  $C_{aboveground}^*$  refer to stem C, leaf C and aboveground C in equilibrium conditions, respectively. Therefore, the aboveground biomass in equilibrium conditions will depend on aboveground NPP ( $ANPP$ ), the  $NPP_{stem}/NPP_{leaf}$  ratio (or  $a_{stem}/a_{leaf}$  ratio) and the turnover rates for leaf and stem ( $u_{leaf}$  and  $u_{stem}$ ).

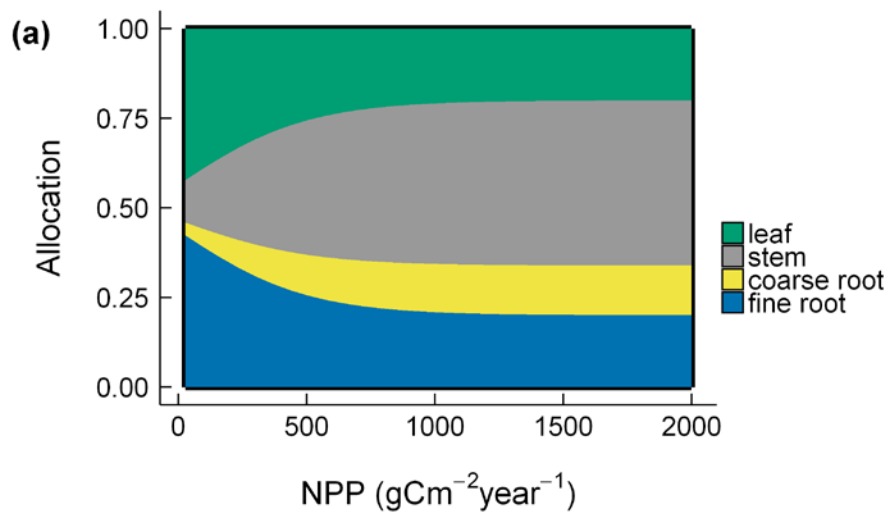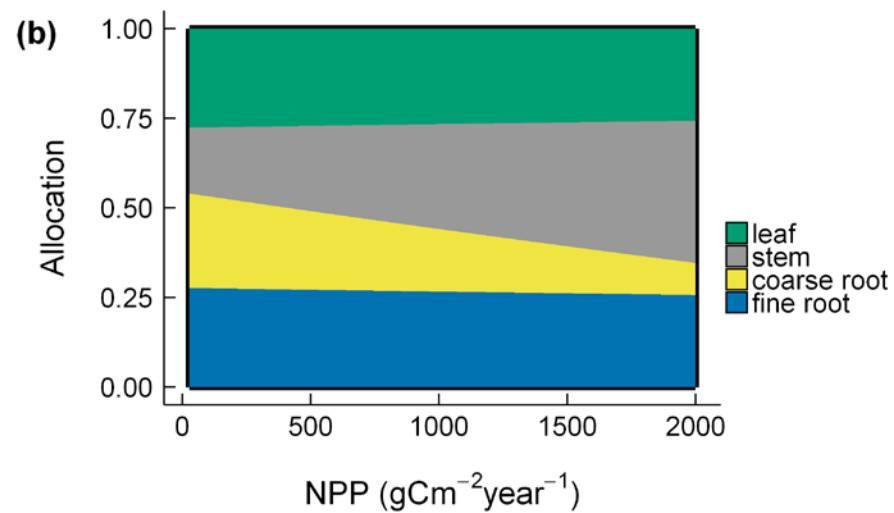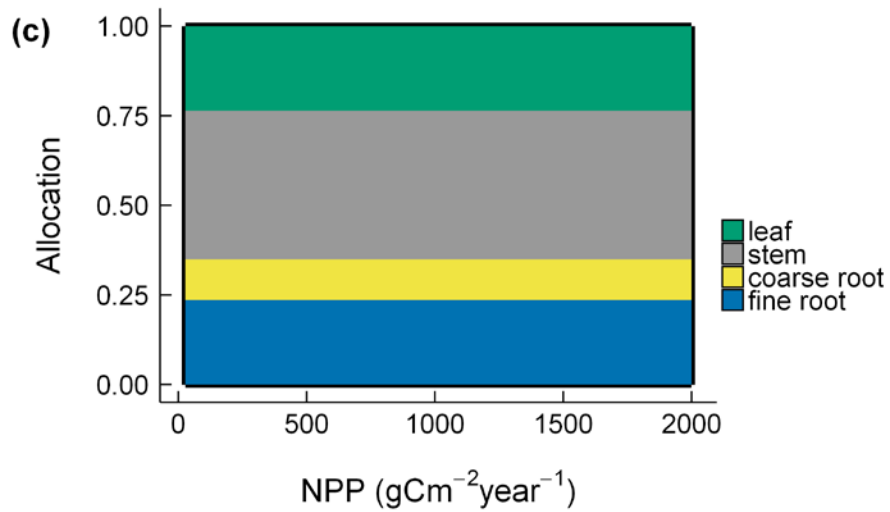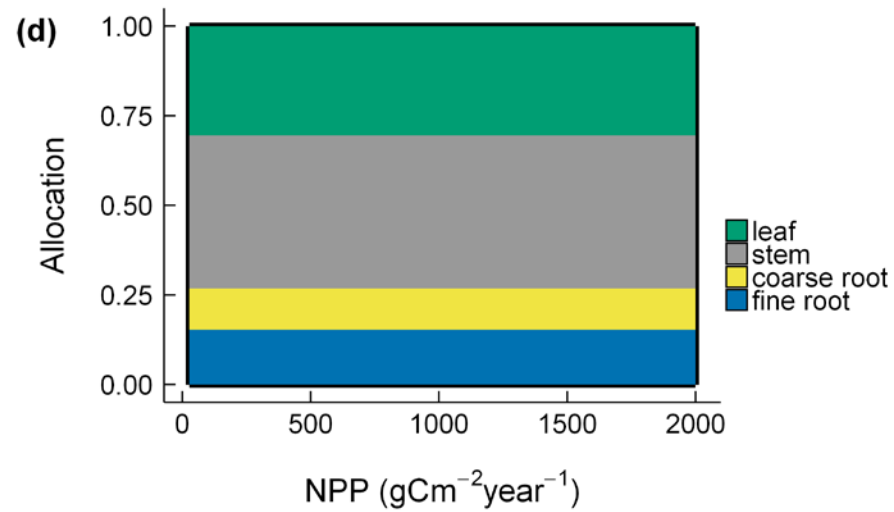

**Figure S1.** Carbon allocation to the different plant pools (leaf, stem, coarse root, and fine root) as a function of annual Net Primary Productivity (NPP) in: (a) D-CLM4.5 C allocation scheme described in Oleson et al., 2013; (b) D-Litton C allocation scheme based on Litton et al., 2007; (c) F-Evergreen C allocation scheme based on Luysaert et al., 2007; (d) F-Deciduous C allocation scheme based on Luysaert et al., 2007.

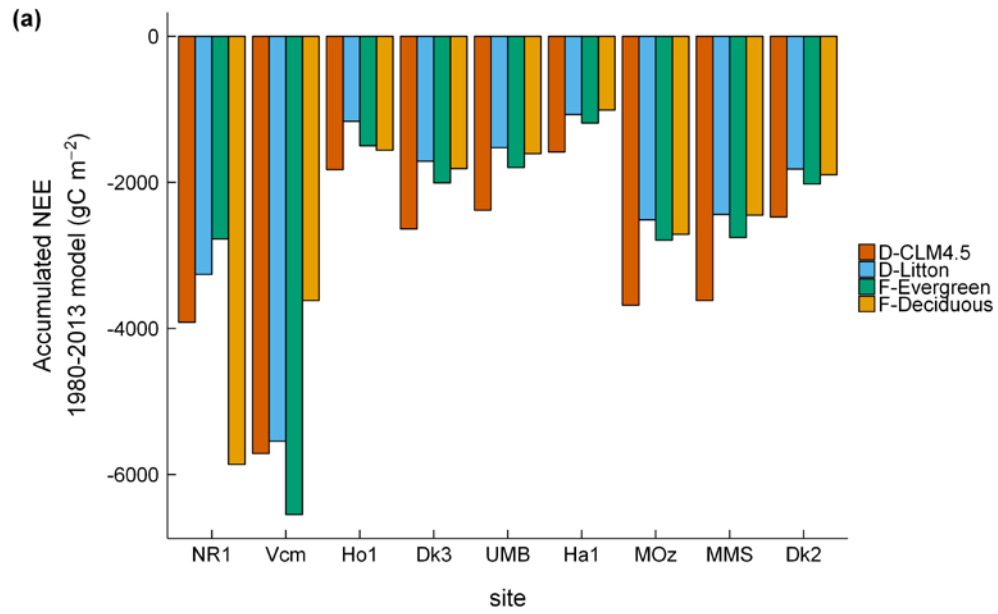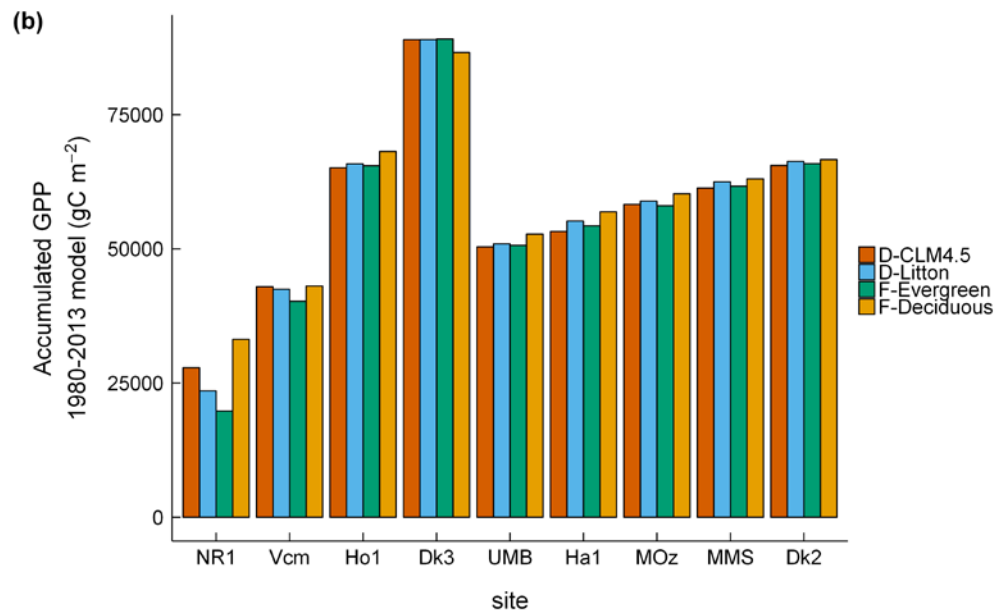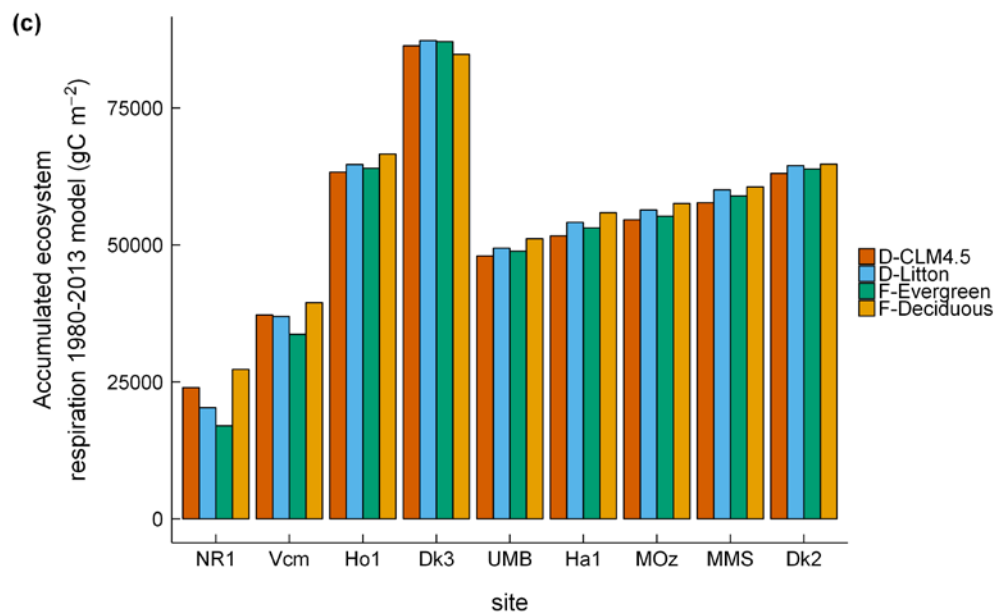

**Figure S2.** Accumulated (a) NEE, (b) GPP, (c) and ecosystem respiration during 1980-2013 for the four C allocation schemes.
